# Supplementary material for: Ag2S-gated ion rectification in confined AgNCs@UiO-66 nanochannels enables sensitive monitoring of bacterial H2S release
Source: Royal Society of Chemistry journal article supplement (doi:10.1039/d5cc03005f), 2025-01-01
Supplement: d5cc03005f1.pdf [file d5cc03005f1.pdf]

Supporting Information for

**Ag<sub>2</sub>S-gated ion rectification in confined AgNCs@UiO-66 nanochannels enables sensitive monitoring of bacterial H<sub>2</sub>S release**

Xiaotong Cui<sup>a,b,‡</sup>, Yuxin Xie<sup>a,b,‡</sup>, Siyu Wan<sup>a,b</sup>, Zhonggang Liu<sup>a,b,\*</sup>, Zheng Guo<sup>a,b,\*</sup>,  
Xingjiu Huang<sup>a,c</sup>

<sup>a</sup> State Key Laboratory of Opto-Electronic Information Acquisition and Protection Technology, Institutes of Physical Science and Information Technology, Anhui University, Hefei, 230601, P.R. China

<sup>b</sup> Key Laboratory of Structure and Functional Regulation of Hybrid Materials of Ministry of Education, Anhui University, Hefei, 230601, P.R. China

<sup>c</sup> Key Laboratory of Environmental Optics and Technology, and Environmental Materials and Pollution Control Laboratory, Institute of Solid State Physics, HFIPS, Chinese Academy of Sciences, Hefei, 230031, P.R. China

<sup>‡</sup>These authors contributed equally to this work.

*\*Corresponding author:*

*E-mail: [zhgliu@ahu.edu.cn](mailto:zhgliu@ahu.edu.cn) (Z. Liu), [zhguo@ahu.edu.cn](mailto:zhguo@ahu.edu.cn) (Z. Guo)*

## **S1. Methods**

### **S1.1. Chemicals**

All chemicals were used directly without further purification. Zirconium tetrachloride ( $\text{ZrCl}_4$ ), 1,4-dicarboxybenzene ( $\text{H}_2\text{BDC}$ ), acetic Acid ( $\text{HAc}$ , 99.5%), dopamine (DA), silver nitrate ( $\text{AgNO}_3$ ), sodium sulfide ( $\text{Na}_2\text{S}$ ), sodium Chloride ( $\text{NaCl}$ ), cysteine (Cys), glutathione (GSH), hydrogen peroxide ( $\text{H}_2\text{O}_2$ ), L(+)-ascorbic acid (AA), uric acid (UA), serotonin (5-HT), ammonium chloride ( $\text{NH}_4\text{Cl}$ ), tris (hydroxymethyl) aminomethane (Tris), glycerin ( $\text{C}_3\text{H}_8\text{O}_3$ ), glycerol, N,N-dimethylformamide (DMF), were purchased from Macklin. Deionized water ( $18.2 \text{ M}\Omega \text{ cm}$  at  $25^\circ\text{C}$ ) was used throughout this work. Platinum wire (0.025 mm diameter, 99.99%, Goodfellow, U.K.). Unless stated otherwise, all experiments were carried out at room temperature.

### **S1.2. Synthesis of UiO-66(Zr)**

UiO-66(Zr) was prepared based on the previous report with slight modifications [1]. Briefly, 0.4 mmol  $\text{ZrCl}_4$  and 0.4 mmol  $\text{H}_2\text{BDC}$ , and 28 mmol  $\text{HAc}$  were successively dissolved in 28 mL DMF. The resulting solution was transferred to a 50 mL Teflon-lined auto-clave and heated at  $120^\circ\text{C}$  for 24 h. Then, the obtained mixture was centrifuged and washed several times with DMF and methanol. Thereafter, the product was dried under vacuum at  $60^\circ\text{C}$  for 18 h for further characterization and measurements.

### **S1.3. Synthesis of AgNCs@UiO-66**

Initially, 20 mg UiO-66(Zr) was uniformly dispersed in 8 mL of deionized water, and the aqueous solution of DA ( $0.1 \text{ mg mL}^{-1}$ , 8 mL) was slowly added under continuous stirring for 90 min. After that, the DA modified UiO-66 was obtained by centrifugation and washed with deionized water. The DA modified UiO-66 was re-dispersed in 8 mL of water, and 4 mL  $\text{AgNO}_3$  solution ( $0.1 \text{ mg mL}^{-1}$ ) was added dropwise in the above solution. The mixture solution was stirred at room temperature for about 7 h to allow for the reduction and deposition of Ag nanoclusters (AgNCs). Subsequently, a grey precipitate was separated by centrifugation at 9000 rpm for 5 min. Finally, the product was dried under vacuum at  $60^\circ\text{C}$  for 18 h for further

application.

#### **S1.4. Material characterization**

The morphology and structure of the prepared AgNCs@UiO-66 were characterized using field emission scanning electron microscopy (FE-SEM, 15 kV Quanta 200 FEG, FEI Company, USA), and transmission electron microscopy (TEM, JEOL-2010). The crystalline structure was characterized using X-ray diffraction (XRD, Smart Lab 9 KW) with Cu Ka radiation. X-ray photoelectron spectroscopy (XPS, VERTEX 80, ThermoFischer company, USA) was applied to analyze element composition and chemical state. The structural characteristics were determined by using the ASAP 2460 3.01e instrument to perform N<sub>2</sub> adsorption-desorption isotherms at a temperature of 77.3 K. Fourier transform infrared spectroscopy (FT-IR) tests were performed on a Hyperion 2000 FT-IR spectrometer. Zeta potential measurements were acquired on a zeta potential analyzer (NanoBrook 90plus PALS, Brookhaven Instruments, U.S.A).

#### **S1.5. Fabrication of modified nanopipette**

Glass nanopipettes were constructed using quartz capillaries with an outer diameter of 1.0 mm and an inner diameter of 0.7 mm (QF100-70-10, Sutter Instrument, Novato, CA). Firstly, the capillaries were treated with a piranha solution for 4 h (*a mixture of 98% sulfuric acid and 30% hydrogen peroxide in a 3:1 volume ratio, caution: It is imperative to note that piranha solution is highly reactive with organic substances and can become dangerously hot during preparation.*). After that, the capillaries were extensively rinsed with distilled water and acetone. The nanopipettes were pulled using a CO<sub>2</sub> laser puller (P-2000, Sutter Instrument, Novato, CA) in the following parameters: HEAT = 700; Fil = 3; VEL = 40; DEL = 175, and PULL = 190. Then the glass nanopipette with a sharp tip was grinded using micro grinder (EG-402, NARISHIGE) to obtain a tip diameter of 30 μm. AgNCs@UiO-66 was uniformly ultrasonically dispersed in deionized water (5 wt %, 1.0 mL). The above dispersion was injected into the nanopipette and kept overnight to dry.

#### **S1.6. Electrochemical measurements**

Before the measurement, the AgNCs@UiO-66/micropipette was back-filled with 0.1

M NaCl solution. The electrochemical measurements were performed in a two-electrode system using an AutoLab potentiostat (PGSTAT302N, Metrohm, Germany). In a two-electrode system, an AgNCs@UiO-66/micropipette with a platinum wire inserted inside was served as the indicator electrode, and a platinum wire was applied as the counter electrode and reference electrode, in which 0.1 M NaCl solution was used as the electrolyte. All potentials were referenced against the Pt electrode. It was conducted in a voltage window between +1.0 V and -1.0 V with a scan rate of 50 mV s<sup>-1</sup>. The current values at -1.0 V were measured and recorded.

## S2. Characterization of AgNCs@UiO-66(Zr)

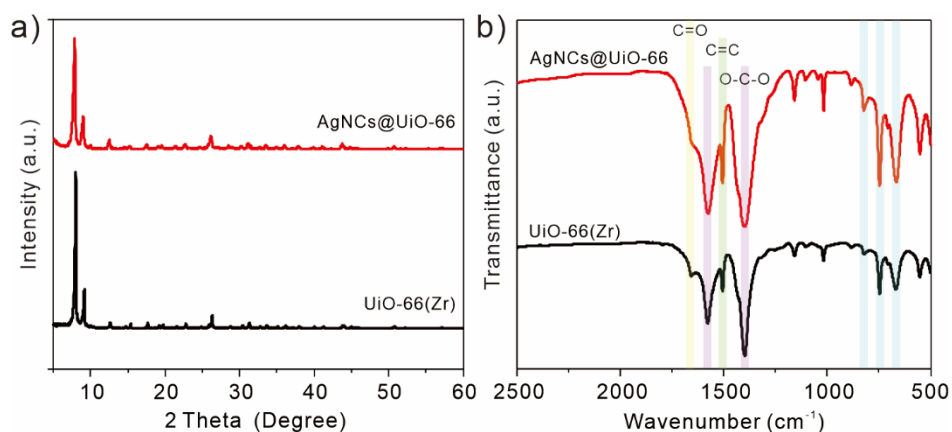

**Fig. S1.** (a) XRD patterns and (b) FT-IR spectra of UiO-66(Zr) and AgNCs@UiO-66(Zr).

The characteristics bands for UiO-66(Zr) and AgNCs@UiO-66 can be clearly observed through Fourier transform infrared spectroscopy (FTIR) (Fig. S1b). The weak absorption band at 1660 cm<sup>-1</sup> corresponds to the stretching vibrations of the C=O bond in the carboxylic acid moiety of BDC. The characteristic bands at 1580 cm<sup>-1</sup> and 1399 cm<sup>-1</sup> are attributed to the asymmetric O-C-O stretching and symmetrical O-C-O stretching within BDC. The band at 1506 cm<sup>-1</sup> is related to the vibrations in the C=C bonds of benzene rings. Furthermore, the bands observed at 825, 746 and 668 cm<sup>-1</sup> are attributed to the vibrations of the OH and C-H groups in the BDC ligand [2].

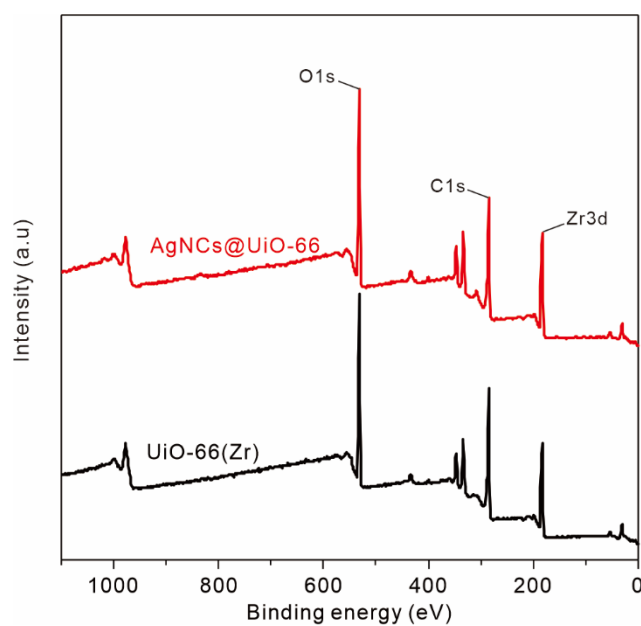

**Fig. S2.** Full scan XPS spectra of UiO-66(Zr) and AgNCs@UiO-66(Zr).

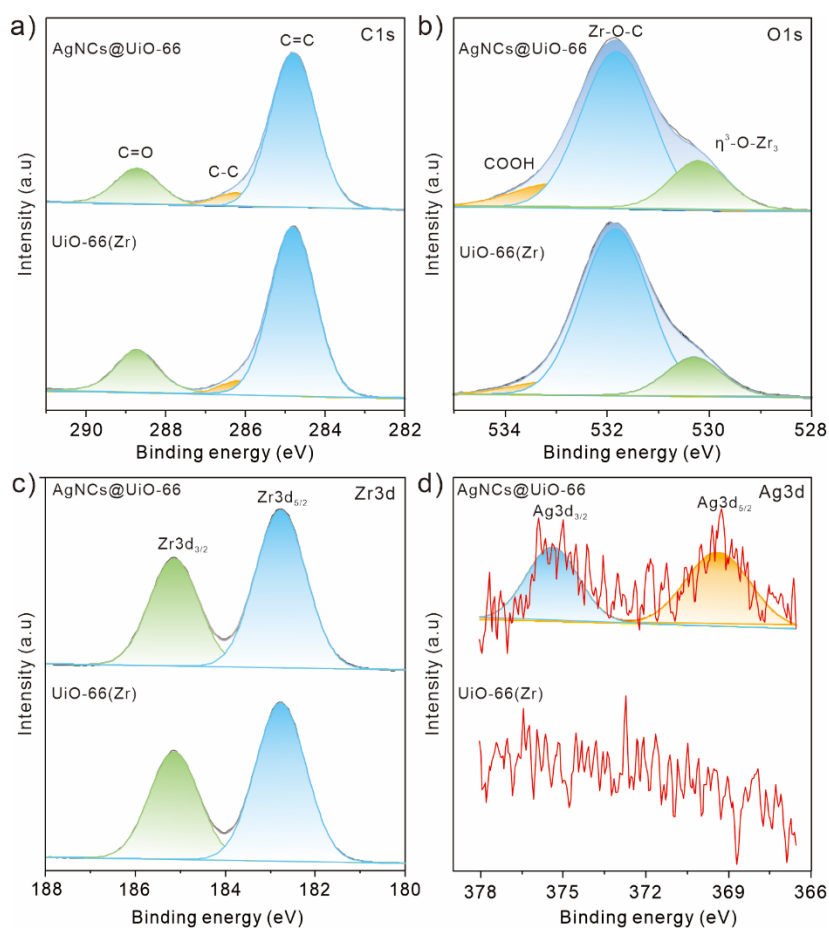

**Fig. S3.** High resolution XPS spectra of (a) C 1s, (b) O 1s, (c) Zr 3d, (d) Ag 3d in UiO-66(Zr) and AgNCs@UiO-66(Zr).

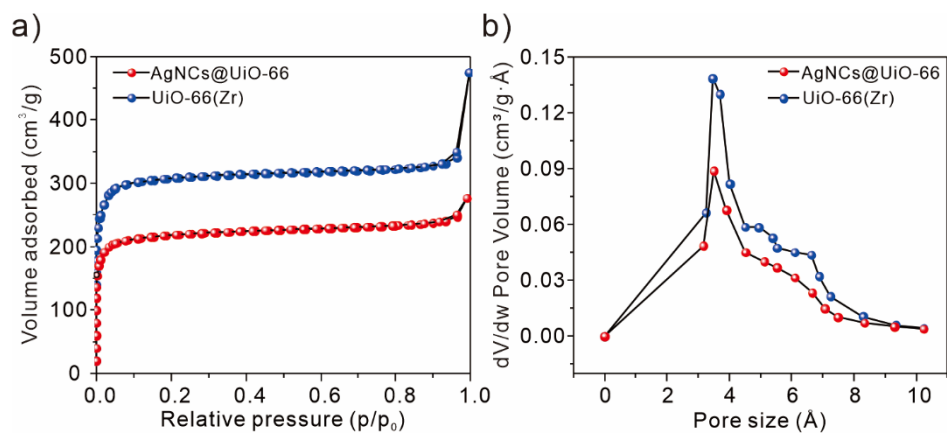

**Fig. S4.** (a) N<sub>2</sub> adsorption/desorption isotherms and (b) pore size distributions of UiO-66(Zr) and AgNCs@UiO-66.

### S3. Micropipette characterization

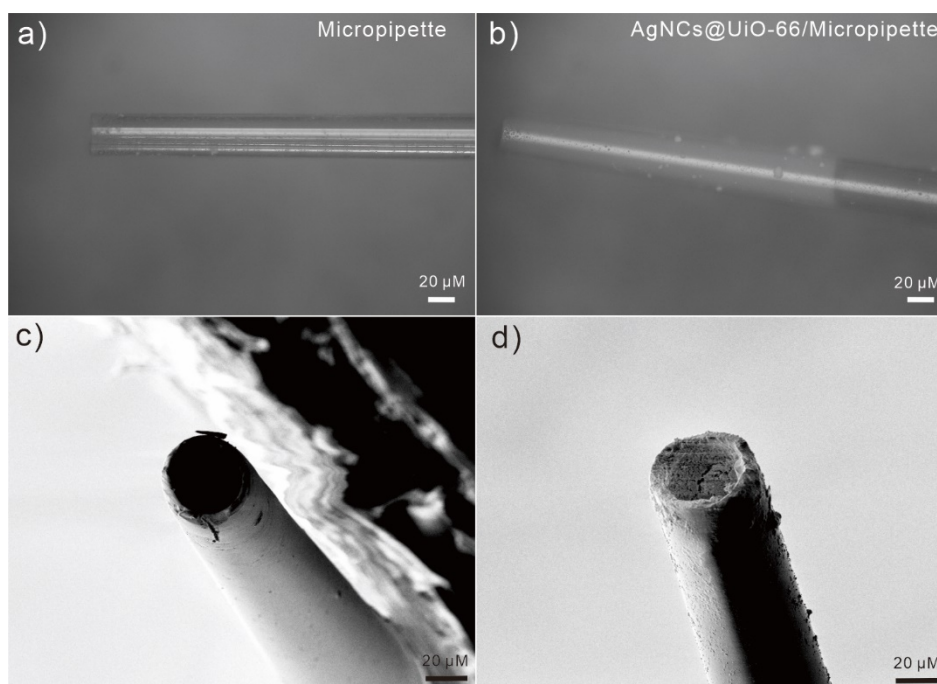

**Fig. S5.** (a, b) Optical images and (c, d) SEM images of (a, c) a typical micropipette and (b, d) AgNCs@UiO-66 modified micropipette.

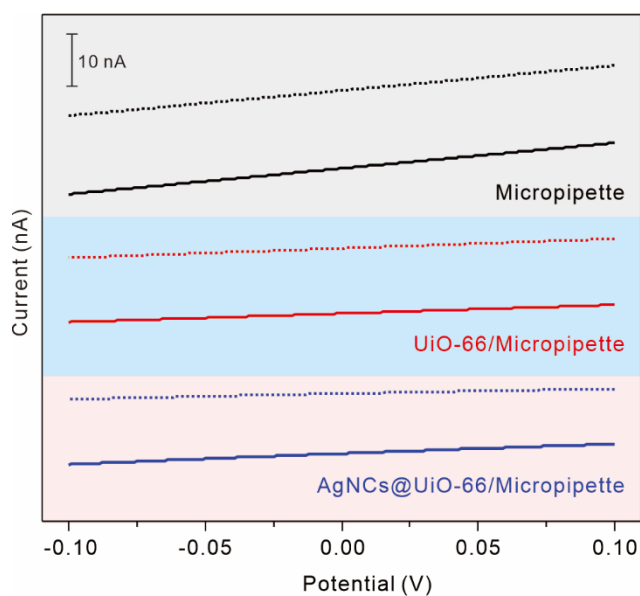

**Fig. S6.** The current-voltage (I-V) curves of micropipette, UiO-66(Zr) and AgNCs@UiO-66 modified micropipettes in 0.1 M NaCl in the absence (dotted line) and in the presence of 0.1 μM Na<sub>2</sub>S (solid line) in a potential ranged between -0.1 V and +0.1 V.

**Table S1.** Resistance of micropipette, UiO-66(Zr)/micropipette, AgNCs@UiO-66(Zr)/micropipette measured in 0.1 M NaCl and 0.1 M NaCl containing 0.1  $\mu$ M Na<sub>2</sub>S

|                           | Resistance (M $\Omega$ ) |                                            |
|---------------------------|--------------------------|--------------------------------------------|
|                           | 0.1 M NaCl               | 0.1 M NaCl + 0.1 $\mu$ M Na <sub>2</sub> S |
| micropipette              | 20.2                     | 19.8                                       |
| UiO-66(Zr)/micropipette   | 53.1                     | 58.6                                       |
| AgNCs@UiO-66/micropipette | 95.2                     | 49.3                                       |

The micropipette, UiO-66(Zr)/micropipette, and AgNCs@UiO-66/micropipette were characterized in 0.1 M NaCl solution (Fig. S5). Their I-V slopes area gradually increased, that is, the corresponding resistances are increased (Table S1). Diameters of the micropipettes can be calculated electrochemically using the slope of current-voltage (I-V) curves and based on the following equation. The diameter ( $2a$ ) at the tip of the nanopipette was calculated to be  $31 \pm 3 \mu\text{m}$

$$a = \frac{1}{\pi k R \tan \frac{\theta}{2}} \quad (\text{S1})$$

R is the measured resistance,  $k$  is the specific resistance of the electrolyte used ( $k = 2.5 \text{ S m}^{-1}$  in 0.1 M NaCl),  $\theta$  is the cone angle ( $3.1^\circ$  in this case),  $a$  is the orifice radius of the nanopore at the tip of the nanopipette.

As observed, the bare micropipette exhibits the lowest resistance as 20 M $\Omega$ . While the resistance is greatly increased with the modification of UiO-66(Zr). And AgNCs@UiO-66 nanochannels lead to higher resistance. Meanwhile, in the presence of 0.1  $\mu$ M Na<sub>2</sub>S, there are no obvious change on the resistances at micropipette, UiO-66(Zr)/micropipette.

The micropipette and UiO-66(Zr)/micropipette exhibit no significant selective

response to  $S^{2-}$  upon the addition of 0.1  $\mu\text{M}$   $\text{Na}_2\text{S}$ , resulting in minimal change in resistance. In contrast, as for the  $\text{AgNCs@UiO-66}$ /micropipette, increasing  $\text{Na}_2\text{S}$  enhances ion flux and surface charge within the nanochannels, consequently lowering resistance.

#### S4. Zeta potentials of UiO-66, $\text{AgNCs@UiO-66}$

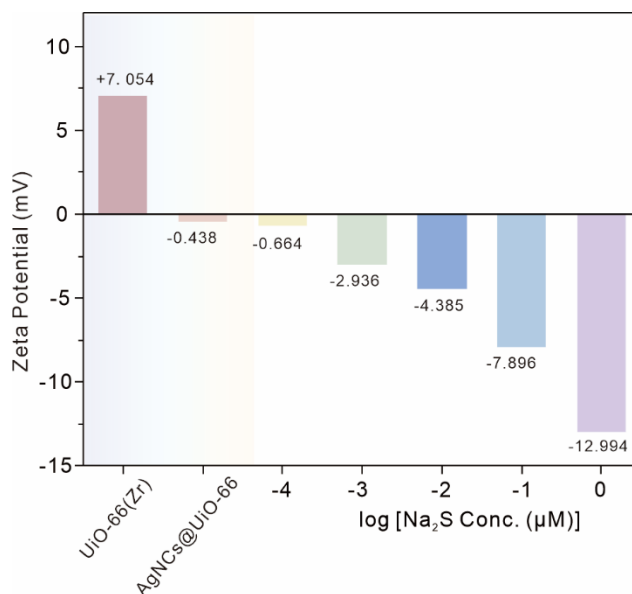

**Fig. S7.** Zeta potentials of UiO-66,  $\text{AgNCs@UiO-66}$ , and  $\text{AgNCs@UiO-66}$  interacted with different concentrations of  $\text{Na}_2\text{S}$ .

## S5. Interference and stability measurement

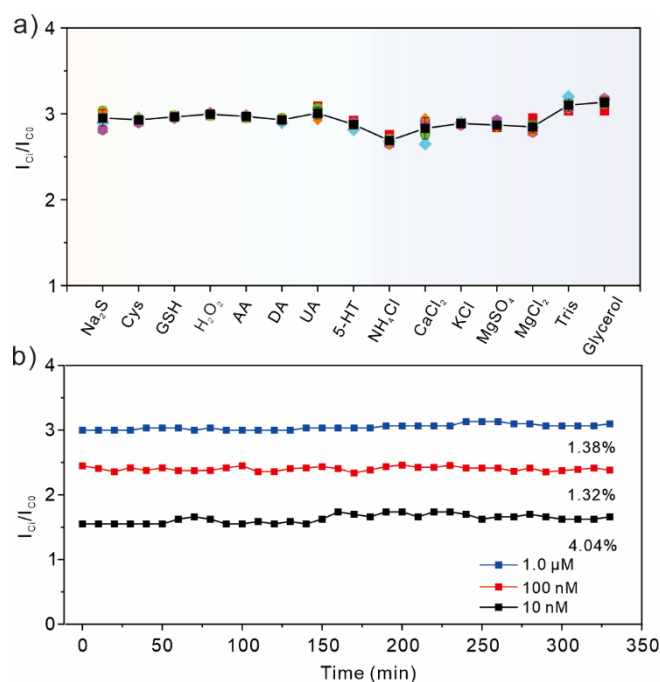

**Fig. S8.** (a) Interference test of AgNCs@UiO-66/micropipette toward 1.0  $\mu\text{M}$   $\text{H}_2\text{S}$  with the presence of sulfur-containing substances, other electroactive substances, and inorganic ions. (b) Stability measurements of AgNCs@UiO-66/micropipette toward  $\text{Na}_2\text{S}$  for 330 min in 0.1 M NaCl solution. Three concentrations of 10 nM, 100 nM, and 1.0  $\mu\text{M}$  were tested.

As is well-known, it is susceptible to interference from electroactive species, particularly sulfur-containing species co-existed with sulfide ions, which could form an Ag–S bond and affect the sensing of  $\text{Na}_2\text{S}$ . In this work, the potential interference of AgNCs@UiO-66/micropipette is evaluated. Fig. S8a shows the current ratio of AgNCs@UiO-66/micropipette toward 1.0  $\mu\text{M}$   $\text{Na}_2\text{S}$  in the presence of the electroactive and sulfur-containing species (20  $\mu\text{M}$  Cys, 20  $\mu\text{M}$  GSH, 10  $\mu\text{M}$   $\text{H}_2\text{O}_2$ , 200  $\mu\text{M}$  AA, 10  $\mu\text{M}$  DA, 50  $\mu\text{M}$  UA, 10  $\mu\text{M}$  5-HT). No obvious change in the current ratios is observed, indicating the favorable selectivity of the AgNCs@UiO-66/micropipette. The formed AgNCs@Ag<sub>2</sub>S could be recognized as an ion-selective membrane, which could minimize the interaction of AgNCs with other sulfur-containing species, thus

avoiding interference [3]. Besides, UiO-66(Zr) nanoparticles integrated with AgNCs present the sub-nanochannels could weaken the diffusion of other electroactive species and prevents the contact of other macromolecular disruptors, thereby minimizing the interference [4,5]. Meanwhile, the surface charge within the AgNCs@UiO-66/micropipette modulates ion transport behaviors, and the interplay between the surface charge, ion mobility, and the results in electric field gradients governs the overall electrochemical dynamics, which further affect the diffusion of electroactive species. Similarly, the effect of the species that coexist in bacterial culture medium was also investigated. As observed, the current ratios of the AgNCs@UiO-66/micropipette toward 1.0  $\mu\text{M}$   $\text{Na}_2\text{S}$  are almost stable in the presence of the ingredients in bacterial culture medium (18.6 mM  $\text{NH}_4\text{Cl}$ , 90.8 mM Tris, 0.099 mM  $\text{CaCl}_2$ , 4.2 mM KCl, 23.1 mM  $\text{MgCl}_2 \cdot 6\text{H}_2\text{O}$ , 2.0 mM  $\text{MgSO}_4$ , 2.0 mM sodium glycerophosphate). These results indicate that the AgNCs@UiO-66/micropipette exhibits high selectivity toward  $\text{Na}_2\text{S}$  with high anti-interference capability.

Subsequently, the stability of the AgNCs@UiO-66/micropipette toward  $\text{Na}_2\text{S}$  was evaluated. The corresponding current responses are detected by I-V scanning in 0.1 M NaCl, and Fig. 4b shows the repeated current ratios at an interval of 10 min on the sensing of  $\text{Na}_2\text{S}$  in the concentrations of 0.01  $\mu\text{M}$ , 0.1  $\mu\text{M}$  and 1.0  $\mu\text{M}$ . No remarkable changes in ratios are observed for a long-time measurement (330 min), and the relative standard deviations (RSDs) are calculated to be 4.04%, 1.32% and 1.38%, respectively. The results demonstrate that AgNCs@UiO-66/micropipette exhibits high stability in the monitoring of  $\text{Na}_2\text{S}$ .

## S6. Bacterial sample measurement

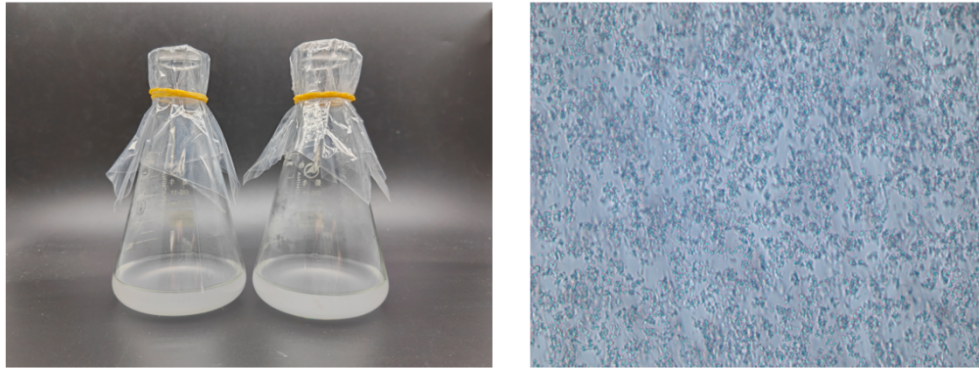

**Fig. S9.** Optical images of (a) bacterial culture and (b) the bacteria.

## S7. A comparison in sensing performance

**Table S2.** A comparison of the sensing performance toward H<sub>2</sub>S.

| Material/Electrode                                                 | Method                  | Electrolyte +<br>Sulfur species      | Linear range (μM)       | LOD<br>(μM)   | Refs             |
|--------------------------------------------------------------------|-------------------------|--------------------------------------|-------------------------|---------------|------------------|
| Bi-MOF-based PAD                                                   | Colorimetric            |                                      | 0 – 40                  | 0.23          | [6]              |
| TPABF-HS                                                           | Fluorescence            | NaHS                                 | 0 – 1000                | 0.42          | [7]              |
| Si/CdTe NPs                                                        | Fluorescence            |                                      | 1 – 20                  | 0.3           | [8]              |
| RO-H <sub>2</sub> S                                                | fluorescence            |                                      | 0 – 150                 | 0.37          | [9]              |
| Luc-H <sub>2</sub> S                                               | Fluorescence            | 0.01 M PBS                           | 0 – 100                 | 0.337         | [10]             |
| Cu[GluC]                                                           | Fluorescence            | Na <sub>2</sub> S                    | 20 – 120                | 0.0496        | [11]             |
| L-Cu <sup>2+</sup> Probe                                           | Fluorescence            | Na <sub>2</sub> S                    | 1 – 11                  | 0.0206        | [12]             |
| FGGH-Cu                                                            | Fluorescence            | NaHS                                 |                         | 0.0222        | [13]             |
| Ti/TiO <sub>2</sub> @HSP                                           | Photoelectrochemistry   | 0.01 M PBS                           | 0.05 – 20               | 0.0078        | [14]             |
| Bi/CFME                                                            | Photoelectrochemistry   | PBS + Na <sub>2</sub> S              | 0 – 200                 | 0.0074        | [15]             |
| microelectrode                                                     |                         |                                      |                         |               |                  |
| Cu-HHTP@Zn-TCPP                                                    | Photoelectrochemistry   | 0.1 M Tris + Na <sub>2</sub> S       | 0.1 – 1500              | 0.62          | [16]             |
| NH <sub>2</sub> -UiO-66@Bi <sub>2</sub> O <sub>3</sub> /SWCNT film | Photoelectrochemistry   | Na <sub>2</sub> S                    | 2.5 – 100               | 0.78          | [17]             |
| Ag <sub>2</sub> S/AgNCs/CF                                         | Electrochemistry        | 250 μM KCl + Na <sub>2</sub> S       | 0.2 – 16.4              | 0.07          | [18]             |
| RuCu-HHTP/CF                                                       | Electrochemistry        | 0.1 M PBS                            | 0.5 – 594400            | 0.5           | [19]             |
| DHP-SQR/AuNPs/LIGE                                                 | Electrochemistry        | Tris-HCl buffer                      | 0.002 – 0.1             | 0.0008        | [20]             |
| PB/SPE                                                             | Electrochemistry        | 0.1 M KCl + NaHS                     | 10 – 100                | 3.0           | [21]             |
| Ag@Ag <sub>2</sub> S core-shell NPs                                | Electrochemistry        | 0.1 M PBS + Na <sub>2</sub> S        | 10 – 460<br>600 – 11000 | 4.0           | [22]             |
| CuFe <sub>2</sub> O <sub>4</sub> /Bcn/GCE                          | Electrochemistry        | 0.1 M PBS + Na <sub>2</sub> S        | 0.005 – 10.0            | 0.00021       | [23]             |
| CoGPCs/G-FET                                                       | Electrochemistry        | Na <sub>2</sub> S                    | 0.00001 – 1000          | 0.00001       | [24]             |
| CoNi-MOFs                                                          | Electrochemistry        | 0.1 M PBS + Na <sub>2</sub> S        | 2 – 2000                | 1.96          | [25]             |
| <b>AgNCs@UiO-66/micropipette</b>                                   | <b>Electrochemistry</b> | <b>0.01 M NaCl + Na<sub>2</sub>S</b> | <b>0.0001 – 100</b>     | <b>0.0001</b> | <b>This Work</b> |

PAD: paper analysis device; TPABF-HS: triphenylamine-benzofuran for hydrogen sulfide;

RO-H<sub>2</sub>S: 10-(diethylamino)-3-(2,4-dinitrophenoxy)-5,6-dihydrobenzo[c]xanthen-12-ium; FGGH:

FITC-Gly-Gly-His-NH<sub>2</sub>; Bcn: lotus leaf-derived carbon material; HSP: H<sub>2</sub>S-specific probe;

CFME: carbon fiber microelectrode; CF: carbon fiber; GF: DHP: Dihexadecylphosphate; SQR:

quinone oxidoreductase; LIGEs: laser-induced graphene; CoGPCs: cobalt phthalocyanine RGO

nanocomposites; FET: field-effect transistor

## S8. References

- [1] R.M. Wang, L. Liu, S. Subhan, Y. Muhammad, Y. Hu, M.Y. Huang, Y. Peng, Z.X. Zhao, Z.X. Zhao, Engineering pH-switchable UiO-66 via in-situ amino acid doping for highly selective adsorption of anionic dyes, *Chem. Eng. J.* 395 (2020) 124958.
- [2] Y. Cao, Y.X. Zhao, Z.J. Lv, F.J. Song, Q. Zhong, Preparation and enhanced CO<sub>2</sub> adsorption capacity of UiO-66/graphene oxide composites, *J. Ind. Eng. Chem.* 27 (2015) 102-107.
- [3] L. Zhang, T.C. Xu, W.L. Ji, X.F. Wang, S.W. Cheng, S. Zhang, Y. Zhang, M.N. Zhang, Ag<sub>2</sub>S/Ag Nanoparticle Microelectrodes for In Vivo Potentiometric Measurement of Hydrogen Sulfide Dynamics in the Rat Brain, *Anal. Chem.* 93 (2021) 7063-7070.
- [4] Z.X. Chen, L. Li, Z.S. Zhao, Y. Zhu, Z.D. Liu, Responsive luminescent silver-based metal-organic frameworks for highly sensitive and selective detection of hydrogen sulfide in biological system via a self-assembled headspace separation device, *Talanta* 267 (2024) 125170.
- [5] Y. Zhang, H.Y. Shen, X. Hai, X.W. Chen, J.H. Wang, Polyhedral Oligomeric Silsesquioxane Polymer-Caged Silver Nanoparticle as a Smart Colorimetric Probe for the Detection of Hydrogen Sulfide, *Anal. Chem.* 89 (2017) 1346-1352.
- [6] J.Y. Zhou, X. Gao, X.Y. Chen, H.Y. Sun, X. Li, L.Y. Shi, Y.Q. Liu, Bi-MOF-based point-of-care testing paper for dual-mode detection of H<sub>2</sub>S, *Biosens. Bioelectron.* 270 (2025) 116934.
- [7] M.Y. Guo, X.J. Liu, Y.Z. Li, B.Z. Wang, Y.S. Yang, H.L. Zhu, A human serum albumin-binding-based fluorescent probe for monitoring hydrogen sulfide and bioimaging, *Analyst* 149 (2024) 1280-1288.
- [8] G.B. Mao, Y. Zeng, C.M. Qiu, G.M. Ding, L.Y. Li, L.X. Ma, J.B. Dai, W. Yin, Y.X. Ma, Ratiometric fluorescent paper chip for monitoring the freshness of high protein foods, *Anal. Chim. Acta* 1334 (2025) 343418.
- [9] X.L. Li, Y.P. Xiong, P.H. Dong, K. Zhang, B. Yan, C. Huang, T.D. James, Y.S. Li, X. Jia, Red-emitting fluorescent probe with excellent water solubility for the

- in situ monitoring of endogenous H<sub>2</sub>S in wheat under salt and Al<sup>3+</sup> stress, *Talanta* 290 (2025) 127808.
- [10] C. Hu, Z.P. Yang, X.R. Shi, Y.R. Xue, L.Y. Huang, C. Tang, F. Wang, In vivo monitoring of endogenous hydrogen sulfide and evaluation of natural protectants in liver injury mice using a highly selective bioluminescent probe, *Biosens. Bioelectron.* 278 (2025) 117343.
- [11] X.W. An, Y. Wang, J.H. Li, Z.C. Pei, Y.X. Pei, Detection of S<sup>2-</sup> in Water by a Glucose Enhanced Water-Soluble Fluorescent Bioprobe, *Biosensors* 12 (2022) 600.
- [12] G.H. Liu, Z.L. Chai, L.L. Gan, X.X. Li, C.Y. Ma, M.X. Du, W.K. Dong, An efficient copper(II) salamo-based complex fluorescence chemosensor for detecting sulfide ions: Structure exploration and practical application, *J. Mol. Struct.* 1306 (2024) 137878.
- [13] Y. An, L.Y. Li, L.P. Li, Y.Q. Sun, B. Li, P. Wang, Peptide-based probe for colorimetric and fluorescent detection of Cu<sup>2+</sup> and S<sup>2-</sup> in environmental and biological systems, *J. Hazard. Mater.* 465 (2024) 133192.
- [14] Y.Q. Hao, Y.W. Yang, W.H. Wang, H. Gu, W.S. Chen, C.L. Li, P.S. Zhang, R.J. Zeng, M.T. Xu, S. Chen, Development of a Photoelectrochemical Microelectrode Using an Organic Probe for Monitoring Hydrogen Sulfide in Living Brains, *Anal. Chem.* 96 (2024) 19822-19832.
- [15] Z.Y. Chen, S. Chen, W.H. Wang, W.F. Liu, H. Gu, P.S. Zhang, R.J. Zeng, Y.Q. Hao, Electrochemical in situ transformation of Bi-based photoactive materials for photoelectrochemical detection of H<sub>2</sub>S in the living brain, *Microchem. J.* 211 (2025) 113164.
- [16] H.L. Zhao, X.W. Li, K. Yu, H.X. Xu, Z.Y. Zhang, H.N. Chai, M.W. Tian, L.J. Qu, X.J. Zhang, G.Y. Zhang, A MOF-on-MOF based photoelectrochemical sensor for hydrogen sulfide detection in food quality assessment, *Sens. Actuators B-Chem.* 433 (2025) 137525.
- [17] Z.P. Song, T.F. Luo, J.R. Ke, S.S. Hu, W.Q. Yang, J.C. Ni, X.P. Chen, Z.H. Chen, A new-style photoelectrochemical sensing device based on NH<sub>2</sub>-UiO-

- 66@Bi<sub>2</sub>O<sub>3</sub> for the sensitive detection of hydrogen sulfide, *Microchem. J.* 206 (2024) 111669.
- [18] R.T. Liu, S. Zhang, H. Zeng, N. Gao, Y.Y. Yin, M.N. Zhang, L.Q. Mao, A Potentiometric Dual-Channel Microsensor Reveals that Fluctuation of H<sub>2</sub>S is Less pH-Dependent During Spreading Depolarization in the Rat Brain, *Angew. Chem. Int. Ed.* 63 (2024) e202318973.
- [19] Y. Xu, W. Huang, H.W. Duan, F. Xiao, Bimetal-organic framework-integrated electrochemical sensor for on-chip detection of H<sub>2</sub>S and H<sub>2</sub>O<sub>2</sub> in cancer tissues, *Biosens. Bioelectron.* 260 (2024) 116463.
- [20] X.Z. Chen, Y. Li, Y.H. Wu, A disposable electrochemical biosensor for detection H<sub>2</sub>S in protoplast, *Microchem. J.* 212 (2025) 113180.
- [21] A. Glovi, A. Miglione, D.C. Maresca, F. Somma, B. Romano, A. Ianaro, A. Giordano, M. De Laurentiis, G. Ercolano, S. Cinti, Paper-based electrochemical device for the determination of H<sub>2</sub>S in murine lysates for liquid biopsy application, *Anal. Chim. Acta* 1342 (2025) 343669.
- [22] X.L. Liu, J.W. Dai, Z.Y. Wang, Y. Xu, A.R. Zhang, Q.Y. Lv, H.F. Liu, G.F. Li, Highly stable potentiometric sensing toward sulfide in vitro living cells with Ag@Ag<sub>2</sub>S core-shell nanoparticles, *Microchem. J.* 209 (2025) 112720.
- [23] N. Zou, X. Li, W.W. Xu, F.A. Meng, Z.X. Wang, J.H. Zhang, X.L. Wang, A Lower Working Potential and Real-Time H<sub>2</sub>S Sensor Based on Nano-CuFe<sub>2</sub>O<sub>4</sub> and Lotus Leaf Derived Carbon Material Composite, *J. Electrochem. Soc.* 171 (2024) 037514.
- [24] L. Xiao, S.S. Yu, Q. Cui, J.C. Liu, G.W. Liang, Y.T. Li, G.J. Zhang, Phthalocyanine-functionalized field-effect transistor biosensor for in situ monitoring of cell-released hydrogen sulfide, *Sens. Actuators B-Chem.* 406 (2024) 135402.
- [25] T. Ma, X. Liu, X.W. Wang, J.G. Ma, P. Cheng, Bottom-Up Construction of Rhombic Lamellar CoNi-MOFs for the Electrochemical Sensing of H<sub>2</sub>S, *Inorg. Chem.* 63 (2024) 7504-7511.
